# Supplementary material for: The Hemiptera (Insecta) of Canada: Constructing a Reference Library of DNA Barcodes
Source: PubMed Central journal article supplement (PMC4414572; doi:10.1371/journal.pone.0125635), 2015-04-29
Supplement: pone.0125635.s004.pdf [file pone.0125635.s004.pdf]

The instructions below are for searching and accessing Hemiptera of Canada Library Records on BOLD. Here we will retrieve a specimen record for a seed bug *Neortholomus scolopax*, collected and identified by noted Canadian Heteropterist Geoffrey G.E. Scudder.

Please create a BOLD account, and login at <http://www.boldsystems.org/>

Once logged in:

1) Choose “Workbench” (at top of page)

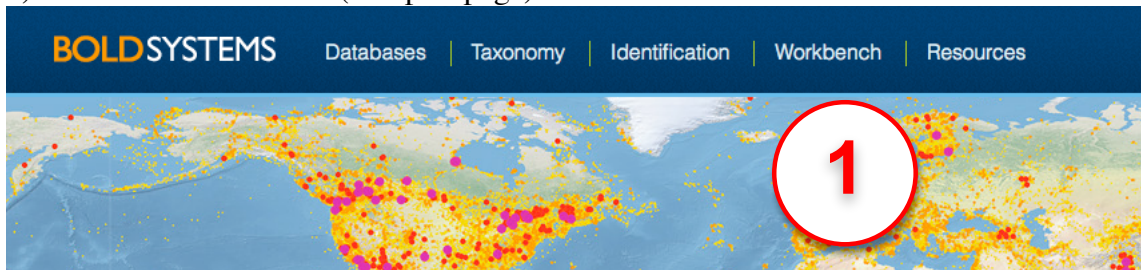

2) Open “Public Datasets” (at center left of page)

2

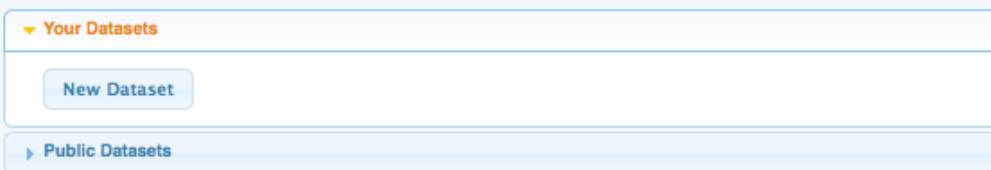

3) Click “Rodger Gwiazdowski” (alphabetically listed by first name)

3

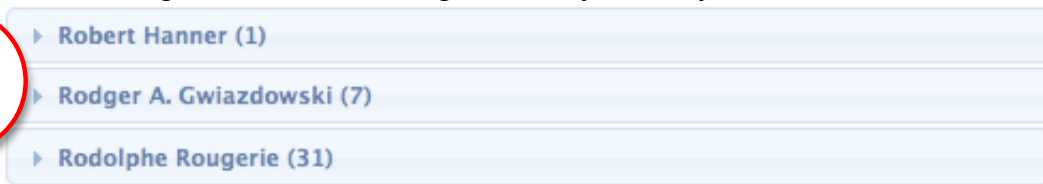

4) Click on the dataset ID: “DS-HECALIB” for the Hemiptera of Canada Library

4

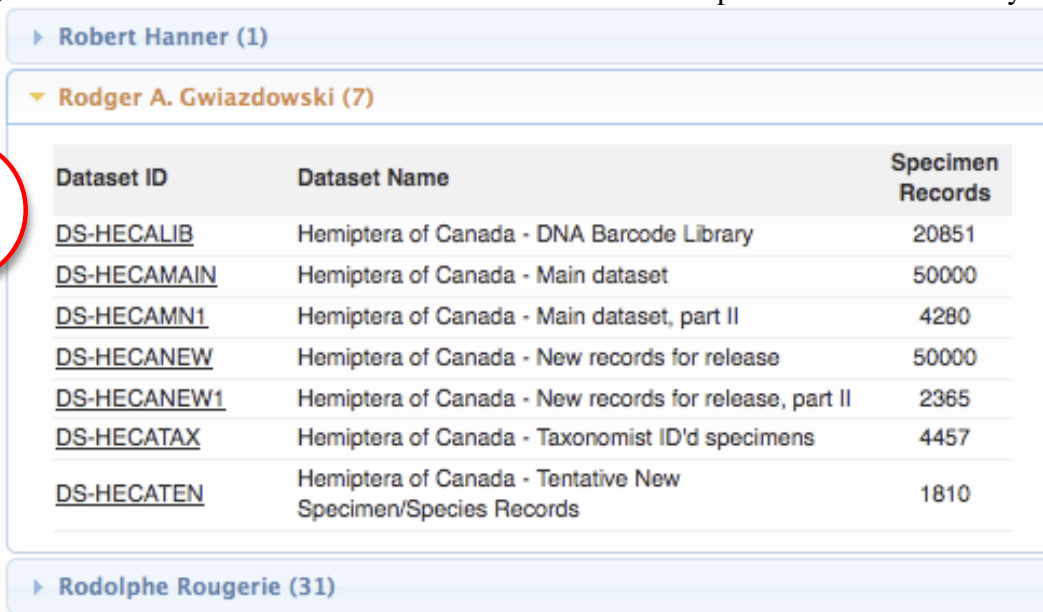

- 5) You are now on the Dataset Console, from which you can access all records by:
- A) Viewing all records
  - B) Downloading all library data as a spreadsheet
  - C) Searching by taxonomy (geography, or other metadata); see details below.

**5**

**BOLD SYSTEMS** Databases | Taxonomy | Identification | Workbench | Resources

Dataset Console - Hemiptera of Canada - DNA Barcode Library [DS-HECALIB]

Project Search:  Code Tag Title | Records:  **C**

**PROJECT DATA VIEWS**

- A** View All Records
- User Console

**PROJECT OPTIONS**

- List All Projects
- Modify Dataset Properties
- Register Primers
- View All Primers

**PUBLICATION**

- Submit to GenBank
- Bibliography Submission
- Project Summary - Specimens, Localities, and GenBank

**UPLOADS**

- B** Data Spreadsheets
- Sequences
- Specimen Labels
- Trace Files

**SEQUENCE ANALYSIS**

- Taxon ID Tree

**Progress**

|        | Specimens (% complete) | Species (% complete) |
|--------|------------------------|----------------------|
| COI-5P | 20851 / 20851 (100%)   | 1880 / 1880 (100%)   |

**Data Summary**

**BINs:** 1874

**Countries:** Canada(17898)  
United States(2923)  
Mexico(30)

**Taxonomy Breakdown:**

**Dataset Details**

**Title:** Hemiptera of Canada - DNA Barcode Library  
**Code:** DS-HECALIB  
**Description:** This is the set of specimens considered as the DNA Barcode Library for the Hemiptera of Canada in the upcoming Hemiptera of Canada manuscript.  
**Marker(s):** COI-5P  
**Bounding Box Coordinates:** Upper Left: N/A  
Lower Right: N/A

**Quality Stats**

**Sequence Quality Stats**

|        | High (<1% Ns) | Medium (<2% Ns) | Low (<4% Ns) | Unreliable (>4% Ns) |
|--------|---------------|-----------------|--------------|---------------------|
| COI-5P | 98.21         | 1.57            | 0.2          | 0.02                |

**Trace Quality Stats**

|        | High(%) | Medium(%) | Low(%) | Failed(%) | Total |
|--------|---------|-----------|--------|-----------|-------|
| COI-5P | 81.2    | 11.16     | 3.53   | 4.11      | 43307 |

- 6) On the Record Search page you can search for records in several ways. To search by taxonomy: click “Search” (C), (for the record search window) entering search terms as “Genus Species” will find that species. Note that you need to include the quotes “ ”, around the binomial name, otherwise the search engine will return all results for that genus species epithet.
- \*Note that Record Searches, that search within a dataset [e.g.: DS-HECALIB] occur by default, when engaging a search within that dataset.

Directly access specimen records using the Process ID (and ID number given during the CCDB laboratory processes) Sample ID (an ID number given during the specimen’s accession to BOLD) or BIN number from the Record Search window:

Click the “List of Identifiers” tab (adjacent to the “Region of Map” tab), enter (type/paste) the record number (s) in the window and click “Search Records”.

Search using either:

Process ID: CNCHA224-11

Sample ID: CNC#HEM300524

\* Many Process IDs/Sample IDs can be searched at once.

6

**Record Search** ✕

Taxonomy

Geography (Country or Province)

Sequence Length **Marker**  Min:  Max:

Tags

Depository

Extra Info

Collection Date (Range) From  To  (Ex. 02-Oct-2005)

**Region of Map** **List of Identifiers**

Identifiers

- Process ids
- GenBank Accession
- Sample ids
- BIN URI\*

CNCHA224-11

\* Barcode Index Number URI (e.g. BOLD:AAA0965)

Search within project [DS-HECALIB]

**Search Records** **Clear** **Cancel**

7) Commenting on the identification, or any other information on a Library record is welcomed!  
. Currently, there are two ways anyone can add information to records:

1) Direct Annotations: each specimen page, and BIN page has a button for public annotation via posted comments (D).

7

**BOLDSYSTEMS**

Specimen - CNC Hemiptera 2011 - 1 [CNCHA] Print

**Edit Specimen**

**IDENTIFIERS**

Sample ID: CNC#HEM300524  
Process ID: CNCHA224-11  
Institution Storing: Canadian National Collection of Insects, Arachnids and Nematodes  
Field ID:  
Museum ID: CNC#HEM300524  
Collection Code: CNC

**TAXONOMY**

Identification: Neortholomus scolopax (Say, 1832, 1832)  
Rank: Species  
Identifier: G. G. E. Scudder  
Identification Method: Morphological Characters  
Identifier Institution:  
Identifier Email:  
Taxonomy Note:  
Rank: Current Record [CNC#HEM300524] Others in BIN [BOLD:AAF3715]  
Phylum: Arthropoda [31]  
Class: Insecta [31]  
Order: Hemiptera [31]  
Family: Lygaeidae [31]  
Subfamily: Orsillinae [30]  
Genus: Neortholomus [30]  
Species: Neortholomus scolopax [30]

**SPECIMEN DETAILS**

Voucher Status:  
Tissue Descriptor:  
Sex:  
Reproduction:  
Life Stage: Adult  
Extra Info:  
Note:  
Associated Taxa:  
Associated Specimens:  
Reference Link:

**PHOTOGRAPHS**

License: Creative Commons Attribution NonCommercial ShareAlike (2011) (CC BY-NC-SA)  
License Holder: CNC/BIO Photography Group, Biodiversity Institute of Ontario

Add Tags & Comments Comments: 0 Associated Tags: No Tags

**GEOGRAPHY**

Country: Canada  
Province/State: British Columbia  
Region/County:  
Sector:  
Exact Site: Revelstoke, 5km E, Johnson Heights  
Lat/Lon: 50.9939, -118.156

**ANNOTATION**

Add Tags & Comments Comments: 0 Associated Tags: No Tags

**D**

2) Editorial Access: editing access for public records can be obtained from the BOLD technical staff. We invite those interested to edit records to please contact the authors, or the BOLD team at [support@boldsystems.org](mailto:support@boldsystems.org) with the nature of your request or observation, and to please include specimen Process IDs (or Sample IDs) where applicable.
