# Supplementary material for: The Hemiptera (Insecta) of Canada: Constructing a Reference Library of DNA Barcodes
Source: PubMed Central journal article supplement (PMC4414572; doi:10.1371/journal.pone.0125635), 2015-04-29
Supplement: pone.0125635.s006.pdf [file pone.0125635.s006.pdf]

## Supplementary Table 1.

### Review of Prior DNA Barcode Library Construction Methods:

To explore construction methods for studies that suggest, or indicate creation of a DNA Barcode library, we performed a literature search via a Web of science "Topic Search" (periodically, from October 2013 - March 2014) using the keywords:

DNA Barcode Librar\*  
DNA Reference librar\*  
Barcode reference librar\*  
Barcode librar\*  
Barcode ref\*.

For each publication we subjectively evaluated the scope, taxa involved, and categorized each work into general patterns of construction.

### Results:

We find 41 citations, spanning the past five years that explicitly discuss creation of a DNA Barcode Reference Library, presented in Supplementary Table 5 (below). Of these, approximately half precede with an a priori taxonomic catalogue, whereas others generate a post-hoc list from the study's results. Most studies take place at taxon, or taxon-by-region scales (country or below), while a few are continental (3) and global (1) in scope. Overall, there is a clear taxon bias toward Insects (19 studies), toward fish among vertebrates (7/10 studies) and a pioneering representation for community assemblages.

|                       | Taxon                                                   | A priori catalogue | Catalogue format                                                                    | Citation                                                                    |
|-----------------------|---------------------------------------------------------|--------------------|-------------------------------------------------------------------------------------|-----------------------------------------------------------------------------|
|                       |                                                         |                    |                                                                                     |                                                                             |
| Insects               | Lepidoptera of Germany                                  | Yes                | Current regional catalogue                                                          | [1]                                                                         |
|                       | Lepidoptera of Australia                                | No                 | Survey of a Natural History Collection                                              | [2]                                                                         |
|                       | Butterflies of Malaysia                                 | No                 | Survey of a Natural History Collection                                              | [3]                                                                         |
|                       | Butterflies of Romania                                  | Yes                | Origin not stated                                                                   | [4]                                                                         |
|                       | Geometrids of Bavaria                                   | Yes                | Current regional Catalogue                                                          | [5]                                                                         |
|                       | Geometrids of British Columbia                          | Yes                | Composite catalogue, unpublished                                                    | [6]                                                                         |
|                       | Noctuidae from Canada                                   | Yes                | Composite catalogue, published within citation                                      | [7]                                                                         |
|                       | The Genus <i>Lymantria</i>                              | Yes                | Current catalogue for Genus                                                         | [8]                                                                         |
|                       | North American Ephemeroptera                            | Yes                | Current regional catalogue                                                          | [9]                                                                         |
|                       | Ephemeroptera, Plecoptera, and Trichoptera of Churchill | Yes                | Composite catalogue, published with reference                                       | [10,11]                                                                     |
|                       | Trichoptera of a National Park                          | Yes                | Current Global Catalogue                                                            | [12]                                                                        |
|                       | Leaf Beetle community in Costa Rica                     | No                 | Regional sampling with post-hoc identification                                      | [13]                                                                        |
|                       | Mosquitoes & Carabid beetles                            | No                 | Regional sampling with post-hoc identification                                      | [14]                                                                        |
|                       | Scale Insects                                           | No                 | Regional sampling, with post-hoc identification                                     | [15]                                                                        |
|                       | Solitary Bees of Ireland                                | Yes                | Unpublished, but recognized catalogue                                               | [16]                                                                        |
|                       | Korean food-pest insects                                | No                 | Regional sampling with post-hoc identification                                      | [17]                                                                        |
|                       | Survey of Tephritid Flies                               | No                 | Global sampling, with post-hoc identification                                       | [18]                                                                        |
|                       | Chironomidae of Korea                                   | No                 | Regional sampling with post-hoc identification                                      | [19]                                                                        |
|                       | Syrphidae of a Greek Island                             | Yes                | Catalogue published with reference                                                  | [20]                                                                        |
|                       | Spiders                                                 | European Spiders   | No                                                                                  | Survey of a Natural History Collection                                      |
| Spiders of Churchill  |                                                         | No                 | Regional sampling with post-hoc identification, catalogue published within citation | [22]                                                                        |
| Vertebrates           | Continental-scale Bird Diversity                        | Yes                | Current regional catalogue                                                          | [23]                                                                        |
|                       | Neotropical Bats of the Royal Ontario Museum            | No                 | Survey of a Natural History Collection                                              | [24]                                                                        |
|                       | Herpetofauna of Korea                                   | No                 | Origin not stated                                                                   | [25]                                                                        |
|                       | Global Fish Diversity                                   | Yes                | Current Global Catalogue                                                            | [26]                                                                        |
|                       | Marine Fishes of Portugal                               | No                 | Regional sampling with post-hoc identification                                      | [27]                                                                        |
|                       | Marine Aquarium Fishes                                  | Yes                | Current Global Catalogue                                                            | [28]                                                                        |
|                       | Cyprinid Aquarium Fishes                                | Yes                | Current, taxon-related catalogues                                                   | [29]                                                                        |
|                       | Marine and Brackish fishes of Argentina                 | No                 | Regional sampling with post-hoc identification                                      | [30]                                                                        |
|                       | Freshwater fishes of North America                      | Yes                | Current regional catalogue                                                          | [31]                                                                        |
|                       | Marine Fishes of São Paulo, Brazil                      | Yes                | Current regional catalogue                                                          | [32]                                                                        |
| Vascular Plants       | Plants and Conifers of Wales                            | Yes                | Survey of Natural History Collection                                                | [33]                                                                        |
|                       | Plants of a Panamanian Forest Plot                      | Yes                | Survey of a Natural History Collection                                              | [34]                                                                        |
|                       | Roots of a Panamanian Forest Plot                       | Yes                | Survey of a Natural History Collection                                              | [35]                                                                        |
|                       | Vascular Plants of Churchill                            | Yes                | Current regional catalogue                                                          | [36]                                                                        |
| Algae                 | Red Algae of Canada and France                          | No                 | Regional sampling with post-hoc identification                                      | [37]                                                                        |
|                       | Crustose Brown Algae                                    | Unknown            |                                                                                     | [38]                                                                        |
| Community Assemblages | Freshwater macroinvertebrates                           | No                 | Survey of a Natural History Collection                                              | [39]                                                                        |
|                       | Marine macroinvertebrates                               | Yes                | Published catalogue                                                                 | [40]                                                                        |
|                       | Arctic food web                                         | Yes                | Regional sampling with post-hoc identification                                      | [41]                                                                        |
|                       | Island, and reefs of Mo'orea                            | No                 | Regional sampling with post-hoc identification                                      | <a href="http://www.moor-eabiocode.org/">http://www.moor-eabiocode.org/</a> |
|                       |                                                         |                    |                                                                                     |                                                                             |

### Citations for Supplementary Table 1:

1. Hausmann A, Haszprunar G, Segerer AH, Speidel W, Behounek G, et al. (2011) Now DNA-barcoded: the butterflies and larger moths of Germany. *Spixiana* 34: 47-58.
2. Hebert PDN, deWaard JR, Zakharov EV, Prosser SWJ, Sones JE, et al. (2013) A DNA 'Barcode Blitz': Rapid Digitization and Sequencing of a Natural History Collection. *PLoS ONE* 8: e68535.
3. Wilson J-J, Sing K-W, Sofian-Azirun M (2013) Building a DNA Barcode Reference Library for the True Butterflies (Lepidoptera) of Peninsula Malaysia: What about the Subspecies? *PLoS ONE* 8.
4. Dincă V, Zakharov EV, Hebert PDN, Vila R (2011) Complete DNA barcode reference library for a country's butterfly fauna reveals high performance for temperate Europe. *Proceedings of the Royal Society B: Biological Sciences* 278: 347-355.
5. Hausmann A, Haszprunar G, Hebert PDN (2011) DNA Barcoding the Geometrid fauna of Bavaria (Lepidoptera): successes, surprises, and questions. *PLoS ONE* 6.
6. deWaard JR, Hebert PDN, Humble LM (2011) A comprehensive DNA Barcode library for the looper moths (Lepidoptera: Geometridae) of British Columbia, Canada. *PLoS ONE* 6.
7. Zahirri R, Lafontaine J, Schmidt B, deWaard J, Zakharov E, et al. (2014) Transcontinental Challenge — A Test of DNA Barcode Performance for 1541 Species of Canadian Noctuoidea (Lepidoptera). *PLoS ONE*, in press.
8. deWaard JR, Mitchell A, Keena MA, Gopurenko D, Boykin LM, et al. (2010) Towards a Global Barcode Library for Lymantria (Lepidoptera: Lymantriinae) Tussock Moths of Biosecurity Concern. *PLoS ONE* 5.
9. Webb JM, Jacobus LM, Funk DH, Zhou X, Kondratieff B, et al. (2012) A DNA Barcode Library for North American Ephemeroptera: Progress and Prospects. *PLoS ONE* 7.
10. Zhou X, Adamowicz S, Jacobus L, DeWalt RE, Hebert P (2009) Towards a comprehensive barcode library for arctic life - Ephemeroptera, Plecoptera, and Trichoptera of Churchill, Manitoba, Canada. *Frontiers in Zoology* 6: 30.
11. Zhou X, Jacobus LM, DeWalt RE, Adamowicz SJ, Hebert PDN (2010) Ephemeroptera, Plecoptera, and Trichoptera fauna of Churchill (Manitoba, Canada): insights into biodiversity patterns from DNA barcoding. *Journal of the North American Benthological Society* 29: 814-837.
12. Zhou X, Robinson JL, Geraci CJ, Parker CR, Flint OS, et al. (2011) Accelerated construction of a regional DNA-barcode reference library: caddisflies (Trichoptera) in the Great Smoky Mountains National Park. *Journal of the North American Benthological Society* 30: 131-162.
13. Garcia-Robledo C, Kuprewicz EK, Staines CL, Kress WJ, Erwin TL (2013) Using a comprehensive DNA barcode library to detect novel egg and larval host plant associations in a *Cephaloleia* rolled-leaf beetle (Coleoptera: Chrysomelidae). *Biological Journal of the Linnean Society* 110: 189-198.
14. Gibson CM, Kao RH, Blevins KK, Travers PD (2012) Integrative Taxonomy for Continental-Scale Terrestrial Insect Observations. *PLoS ONE* 7: e37528.
15. Park D-S, Suh S-J, Hebert PDN, Oh H-W, Hong K-J (2011) DNA barcodes for two scale insect families, mealybugs (Hemiptera: Pseudococcidae) and armored scales (Hemiptera: Diaspididae). *Bulletin of Entomological Research* 101: 429-434.

16. Magnacca KN, Brown MJF (2012) DNA barcoding a regional fauna: Irish solitary bees. *Molecular Ecology Resources* 12: 990-998.
17. Cho SY, Suh KI, Bae YJ (2013) DNA barcode library and its efficacy for identifying food-associated insect pests in Korea. *Entomological Research* 43: 253-261.
18. Virgilio M, Jordaens K, Breman FC, Backeljau T, De Meyer M (2012) Identifying Insects with Incomplete DNA Barcode Libraries, African Fruit Flies (Diptera: Tephritidae) as a Test Case. *PLoS ONE* 7: e31581.
19. Kim S, Song KH, Ree HI, Kim W (2012) A DNA barcode library for Korean Chironomidae (Insecta: Diptera) and indexes for defining barcode gap. *Molecules and Cells* 33: 9-17.
20. Stahls G, Vujic A, Perez-Banon C, Radenkovic S, Rojo S, et al. (2009) COI barcodes for identification of Merodon hoverflies (Diptera, Syrphidae) of Lesvos Island, Greece. *Molecular Ecology Resources* 9: 1431-1438.
21. Miller J, Beentjes K, van Helsdingen P, Ijland S (2013) Which specimens from a museum collection will yield DNA barcodes? A time series study of spiders in alcohol. *Zookeys* 365: 245-261.
22. Blagoev GA, Nikolova NI, Sobel CN, Hebert PDN, Adamowicz SJ (2013) Spiders (Araneae) of Churchill, Manitoba: DNA barcodes and morphology reveal high species diversity and new Canadian records. *BMC Ecology* 13: 44-44.
23. Lijtmaer DA, Kerr KCR, Barreira AS, Hebert PDN, Tubaro PL (2011) DNA Barcode Libraries Provide Insight into Continental Patterns of Avian Diversification. *PLoS ONE* 6.
24. Clare EL, Lim BK, Fenton MB, Hebert PDN (2011) Neotropical Bats: Estimating Species Diversity with DNA Barcodes. *PLoS ONE* 6.
25. Jeong TJ, Jun J, Han S, Kim HT, Oh K, et al. (2013) DNA barcode reference data for the Korean herpetofauna and their applications. *Molecular Ecology Resources* 13: 1019-1032.
26. Hanner R, Desalle R, Ward RD, Kolokotronis S-O (2011) The Fish Barcode of Life (FISH-BOL) special issue. *Mitochondrial DNA* 22: 1-2.
27. Costa FO, Landi M, Martins R, Costa MH, Costa ME, et al. (2012) A Ranking System for Reference Libraries of DNA Barcodes: Application to Marine Fish Species from Portugal. *PLoS ONE* 7: e35858.
28. Steinke D, Zemplak TS, Hebert PDN (2009) Barcoding Nemo: DNA-Based Identifications for the Ornamental Fish Trade. *PLoS ONE* 4.
29. Collins RA, Armstrong KF, Meier R, Yi YG, Brown SDJ, et al. (2012) Barcoding and Border Biosecurity: Identifying Cyprinid Fishes in the Aquarium Trade. *PLoS ONE* 7.
30. Mabragana E, de Astarloa JMD, Hanner R, Zhang JB, Castro MG (2011) DNA Barcoding Identifies Argentine Fishes from Marine and Brackish Waters. *PLoS ONE* 6.
31. April J, Mayden RL, Hanner RH, Bernatchez L (2011) Genetic calibration of species diversity among North America's freshwater fishes. *Proceedings of the National Academy of Sciences of the United States of America* 108: 10602-10607.
32. Ribeiro AD, Caires RA, Mariguela TC, Pereira LHG, Hanner R, et al. (2012) DNA barcodes identify marine fishes of Sao Paulo State, Brazil. *Molecular Ecology Resources* 12: 1012-1020.
33. de Vere N, Rich TCG, Ford CR, Trinder SA, Long C, et al. (2012) DNA Barcoding the native flowering plants and conifers of Wales. *PLoS ONE* 7: e37945.
34. Kress WJ, Erickson DL, Andrew Jones F, Swenson NG, Perez R, et al. (2009) Plant DNA barcodes and a community phylogeny of a tropical forest dynamics plot in Panama.

Proceedings of the National Academy of Sciences of the United States of America  
106: 18621-18626.

35. Jones FA, Erickson DL, Bernal MA, Bermingham E, Kress WJ, et al. (2011) The Roots of Diversity: Below Ground Species Richness and Rooting Distributions in a Tropical Forest Revealed by DNA Barcodes and Inverse Modeling. *PLoS ONE* 6.
36. Kuzmina ML, Johnson KL, Barron HR, Hebert PDN (2012) Identification of the vascular plants of Churchill, Manitoba, using a DNA barcode library. *BMC Ecology* 12.
37. Gall LLE, Saunders GW (2010) Establishment of a DNA-barcode library for the Nemaliales (Rhodophyta) from Canada and France uncovers overlooked diversity in the species *Nemalion helminthoides* (Velley) Batters. *Cryptogamie Algologie* 31: 403-421.
38. Parente MI, Costa FO, Fletcher RL, Saunders GW (2011) A DNA Barcode Library for Crustose Brown Algal Species *European Journal of Phycology* 46: 66-67.
39. Baird DJ, Pascoe TJ, Zhou X, Hajibabaei M (2011) Building freshwater macroinvertebrate DNA-barcode libraries from reference collection material: formalin preservation vs specimen age. *Journal of the North American Benthological Society* 30: 125-130.
40. Aylagas E, Borja Á, Rodríguez-Ezpeleta N (2014) Environmental Status Assessment Using DNA Metabarcoding: Towards a Genetics Based Marine Biotic Index (gAMBI). *PLoS ONE* 9: e90529.
41. Wirta HK, Hebert PDN, Kaartinen R, Prosser SW, Várkonyi G, et al. (2014) Complementary molecular information changes our perception of food web structure. *Proceedings of the National Academy of Sciences* 111: 1885-1890.
